# Supplementary material for: Molecular engineering to enhance the reactive oxygen species generation of AIEgens and exploration of their versatile applications
Source: Royal Society of Chemistry journal article supplement (doi:10.1039/d3tb01367g), 2023-01-01
Supplement: d3tb01367g1.pdf [file d3tb01367g1.pdf]

## Supporting information

### **Molecular Engineering to Enhance the Reactive Oxygen Species Generation of AIEgens and Exploration of Their Versatile Applications**

Weidong Yin,<sup>a</sup> Jianqing Li,<sup>b</sup> Yucheng Ma,<sup>a</sup> Longjiang Xing,<sup>a</sup> Zeduan Chen,<sup>a</sup> Bo Liu,<sup>a</sup> Yanping Huo,<sup>a</sup>  
Zujin Zhao,<sup>\*b</sup> and Shaomin Ji<sup>\*a</sup>

Light Industry and Chemical Engineering College, Guangdong University of  
Technology, Guangzhou, Guangdong 510006, China

E-mail: smji@gdut.edu.cn

## Contents

|                                                                          |    |
|--------------------------------------------------------------------------|----|
| 1. Experimental details .....                                            | 3  |
| 2. $^1\text{H}$ NMR and $^{13}\text{C}$ NMR Spectra of compounds .....   | 4  |
| 3. The date of excited state level, photophysical and photodynamic ..... | 8  |
| 4. Study on AIE properties of compounds .....                            | 9  |
| 5. Photostability and solvation effect of compounds .....                | 10 |
| 6. Study on ROS generation of compounds .....                            | 10 |
| 7. Cell imaging and cell viability test of compounds .....               | 16 |
| 8. Mechanoluminescent properties of compounds .....                      | 16 |
| 9. Single crystal date of TPE-Pys-B .....                                | 18 |

## 1. Experimental details

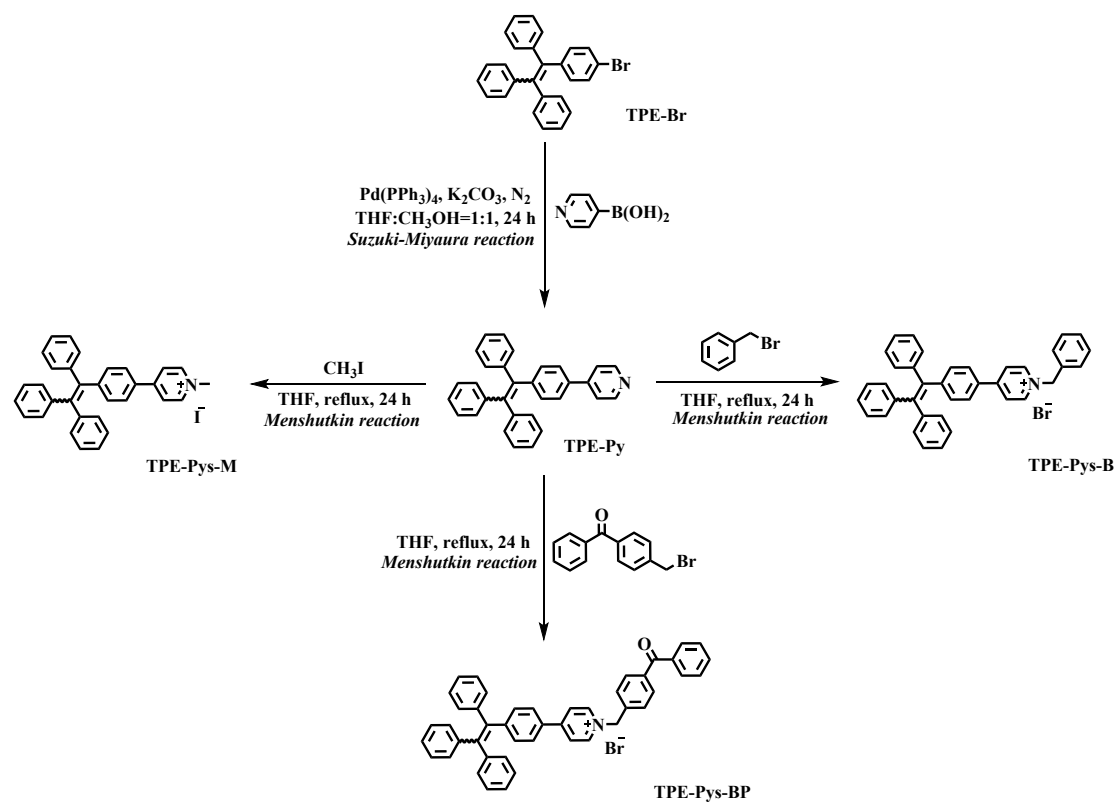

**Scheme S1.** Synthetic routes of TPE-Py, TPE-Pys-M, TPE-Pys-B and TPE-Pys-BP.

## 2. $^1\text{H}$ NMR and $^{13}\text{C}$ NMR Spectra of compounds

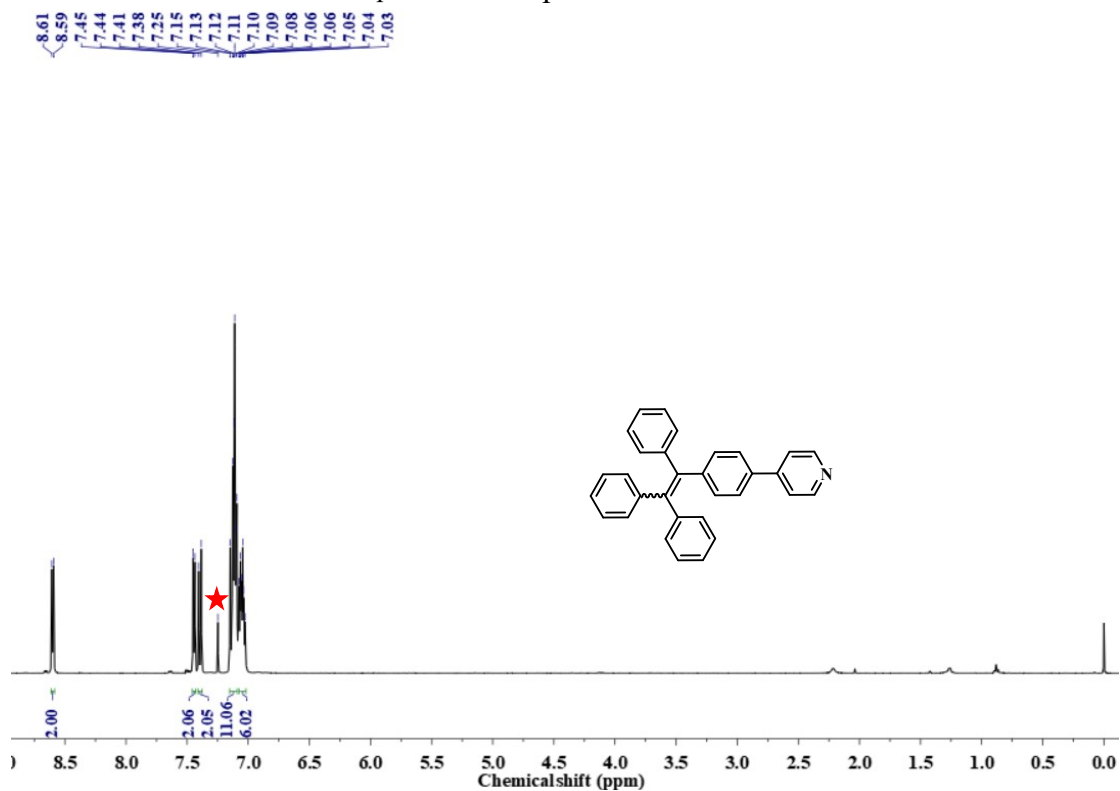

Figure S1.  $^1\text{H}$  NMR Spectra of TPE-Py.

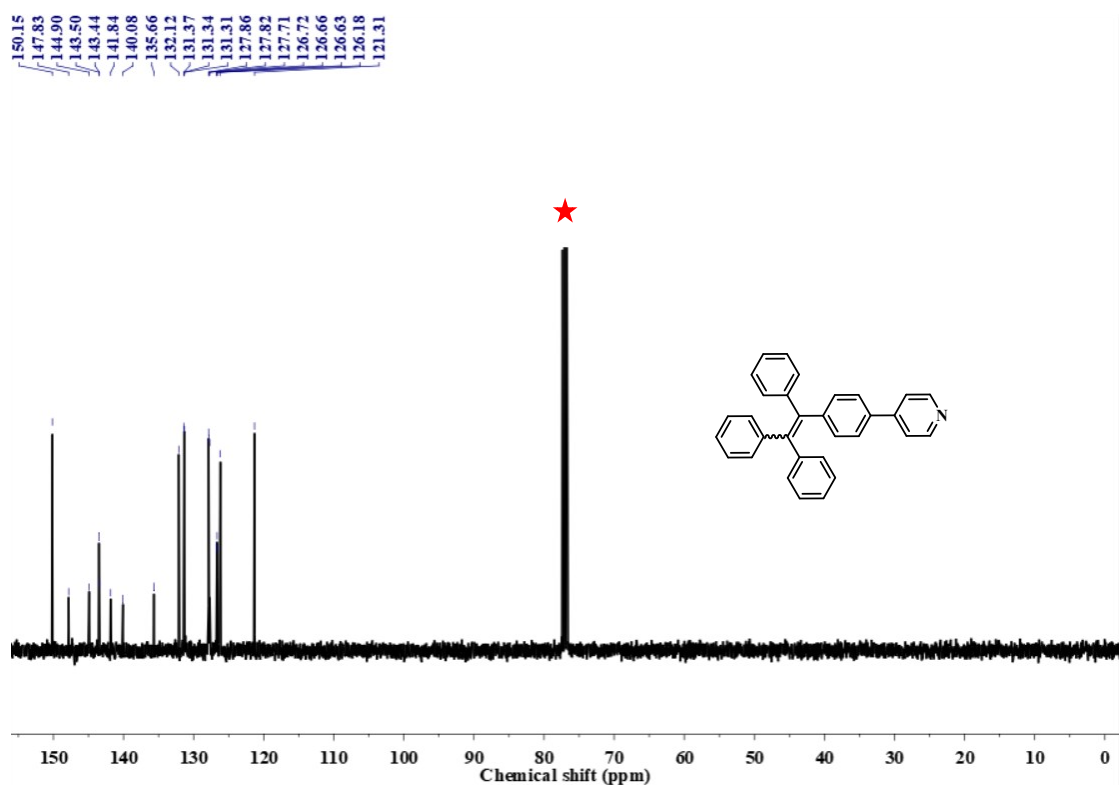

Figure S2.  $^{13}\text{C}$  NMR Spectra of TPE-Py.

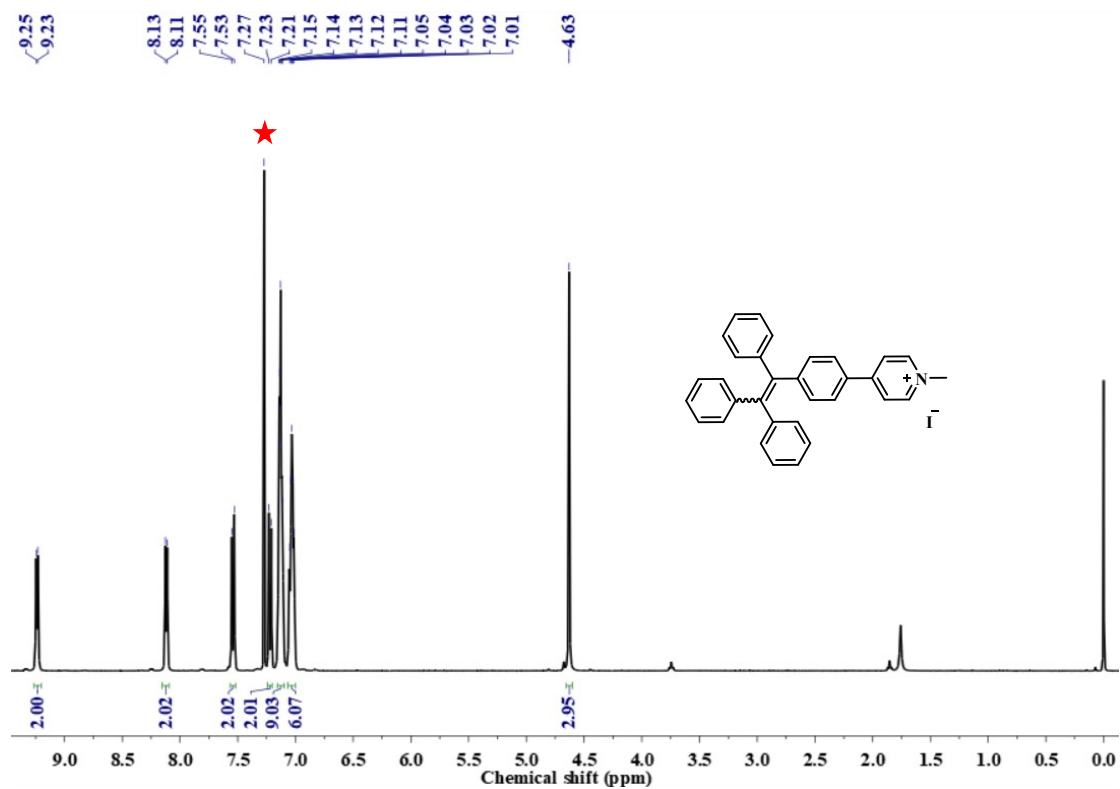

Figure S3.  $^1\text{H}$  NMR Spectra of TPE-Pys-M.

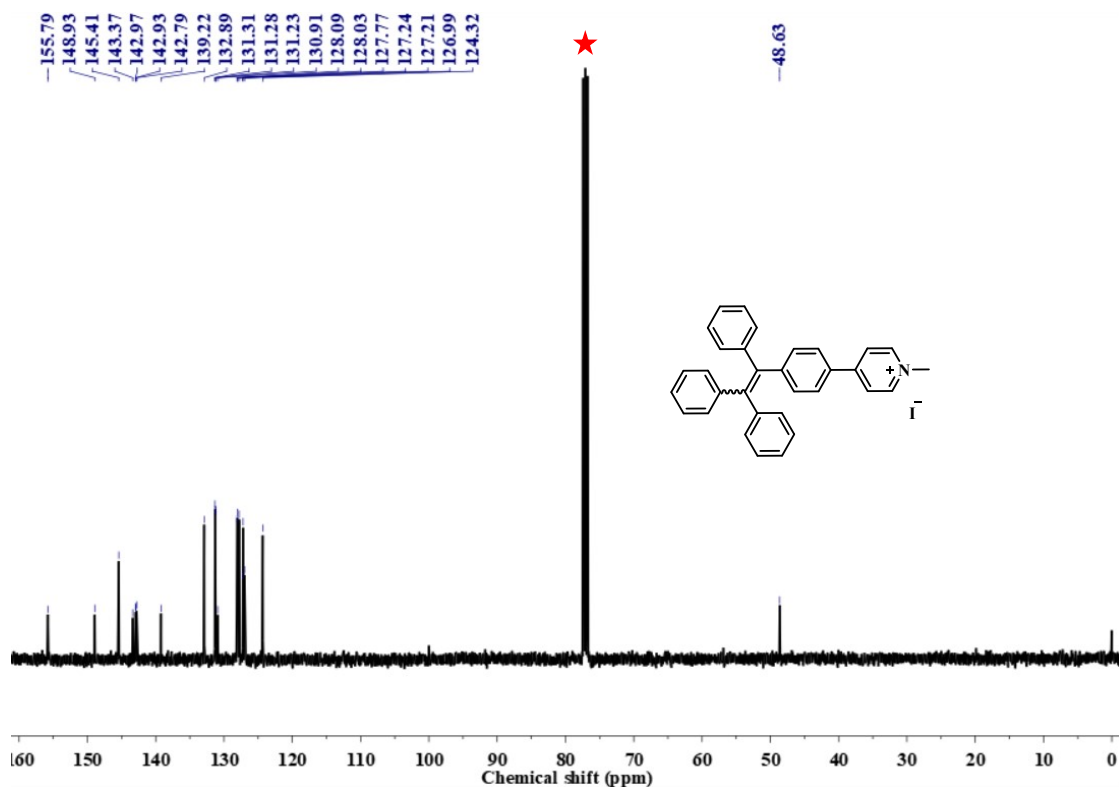

Figure S4.  $^{13}\text{C}$  NMR Spectra of TPE-Pys-M.

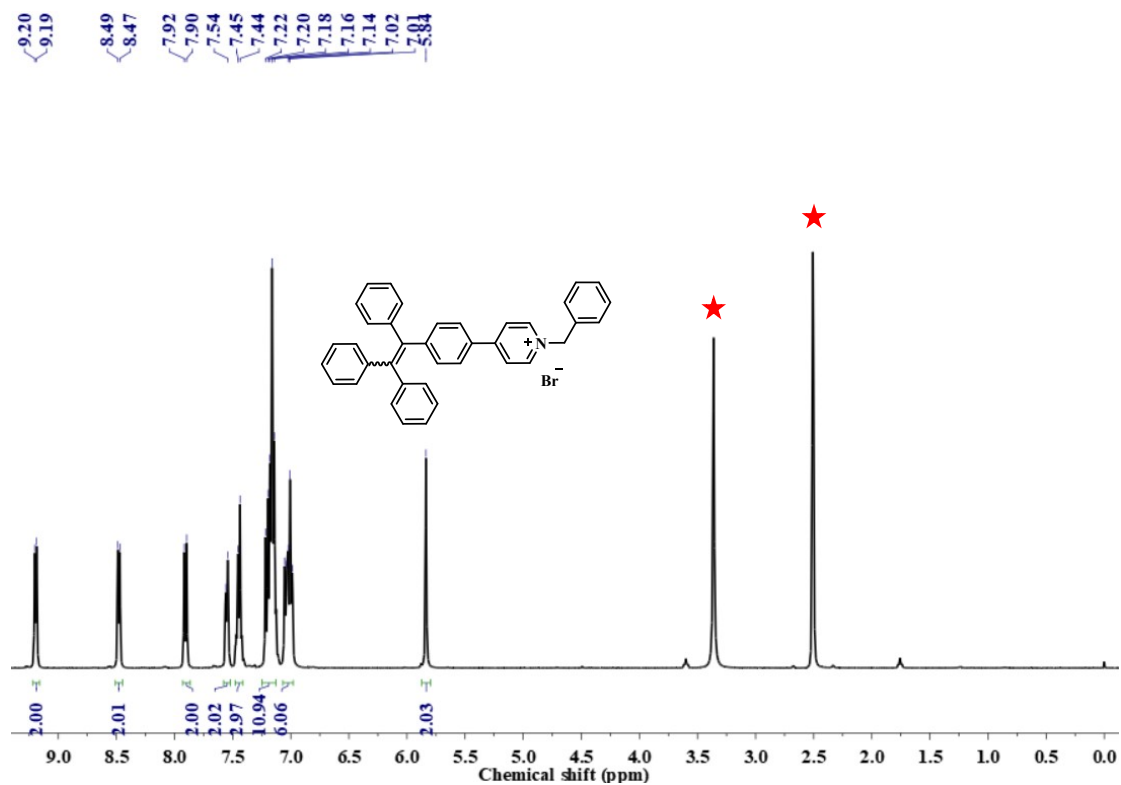

Figure S5.  $^1\text{H}$  NMR Spectra of TPE-Pys-B.

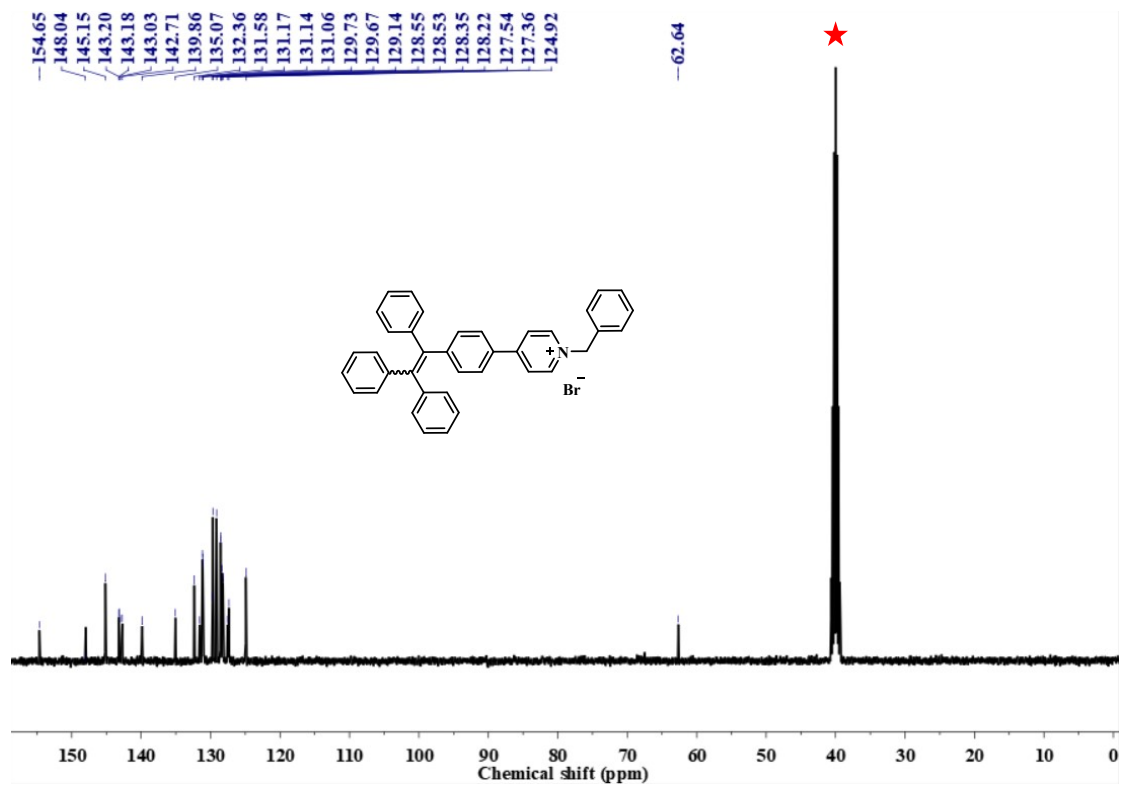

Figure S6.  $^{13}\text{C}$  NMR Spectra of TPE-Pys-B.

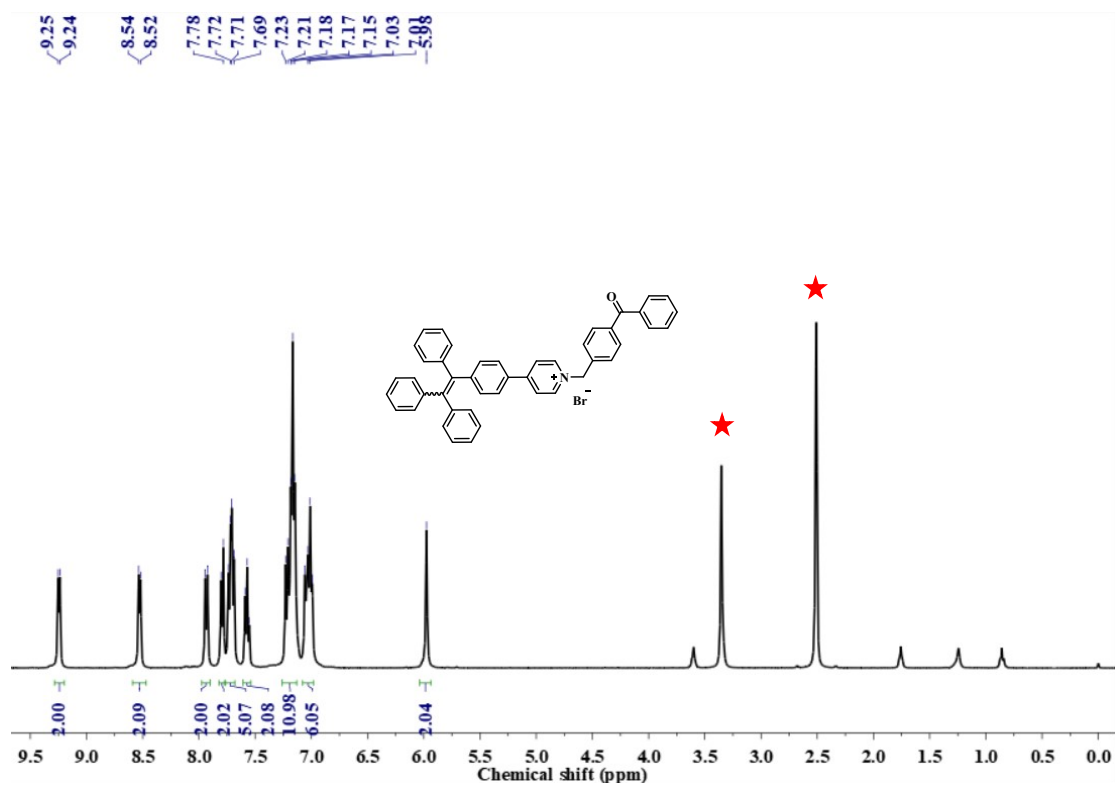

Figure S7.  $^1\text{H}$  NMR Spectra of TPE-Pys-BP.

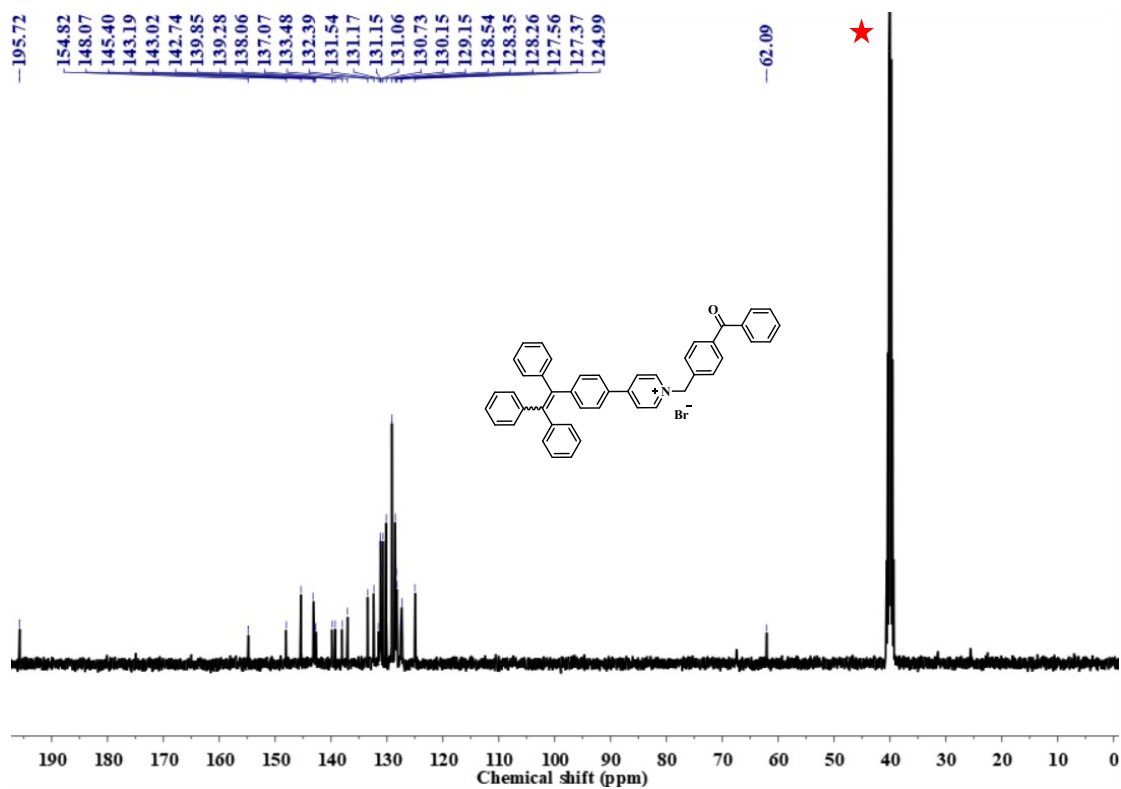

Figure S8.  $^{13}\text{C}$  NMR Spectra of TPE-Pys-BP.

### 3. The date of excited state level, photophysical and photodynamic

Table S1 Calculated energy of the singlet (S) and triplet (T) excited states

| Compounds      | TPE-Py | TPE-Pys-M | TPE-Pys-B | TPE-Pys-BP |
|----------------|--------|-----------|-----------|------------|
| S <sub>1</sub> | 4.0995 | 2.5787    | 2.7070    | 2.6851     |
| S <sub>2</sub> | 4.8827 | 3.7811    | 3.9276    | 3.7325     |
| S <sub>3</sub> | 4.9418 | 3.9111    | 4.0600    | 3.9054     |
| T <sub>1</sub> | 2.4938 | 1.8970    | 2.0066    | 1.9924     |
| T <sub>2</sub> | 3.1823 | 2.7836    | 2.8155    | 2.8120     |
| T <sub>3</sub> | 3.4274 | 3.2128    | 3.3068    | 2.9833     |
| T <sub>4</sub> | 3.4915 | 3.3799    | 3.4062    | 3.2943     |
| T <sub>5</sub> | 3.7499 | 3.4621    | 3.5109    | 3.3382     |
| T <sub>6</sub> | 3.9144 | 3.5062    | 3.5626    | 3.4035     |

Table S2. Photophysical and photodynamic data of the compounds

| Compounds  | $\lambda_{\text{abs}}$<br>(nm) | $\lambda_{\text{ex}}$<br>(nm) | $\lambda_{\text{em}}$<br>(nm)<br>solid | $\Phi$ (%) | $\epsilon$ (M <sup>-1</sup><br>cm <sup>-1</sup> ) | $\tau$ (ns) | ROS<br>yield<br>(RB=1) | $\Delta E_{\text{L-H}}$<br>(eV) | SOC<br>constant |
|------------|--------------------------------|-------------------------------|----------------------------------------|------------|---------------------------------------------------|-------------|------------------------|---------------------------------|-----------------|
| TPE-Py     | 325                            | 370                           | 453                                    | 50.27      | 33168                                             | 2.33        | 0.018                  | 3.582                           | 0.293           |
| TPE-Pys-M  | 366                            | 452                           | 562                                    | 13.15      | 39528                                             | 3.71        | 0.022                  | 4.071                           | 0.267           |
| TPE-Pys-B  | 372                            | 450                           | 524                                    | 65.47      | 40291                                             | 3.57        | 0.024                  | 4.232                           | 0.272           |
| TPE-Pys-BP | 374                            | 415                           | 525                                    | 68.92      | 46830                                             | 2.63        | 0.818                  | 4.209                           | 0.446           |



#### 4. Study on AIE properties of compounds

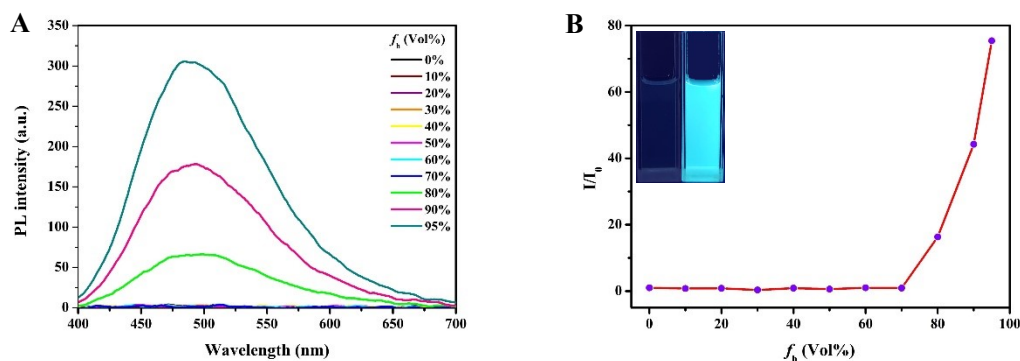

**Figure S9.** (A, B) PL spectra and the plot of the emission maximum of TPE-Py in dichloromethane and *n*-hexane mixture with different *n*-hexane fractions (0-95%). Inset: fluorescent photographs of TPE-Py in pure dichloromethane and in dichloromethane and *n*-hexane mixtures when the addition of *n*-hexane was 95%.

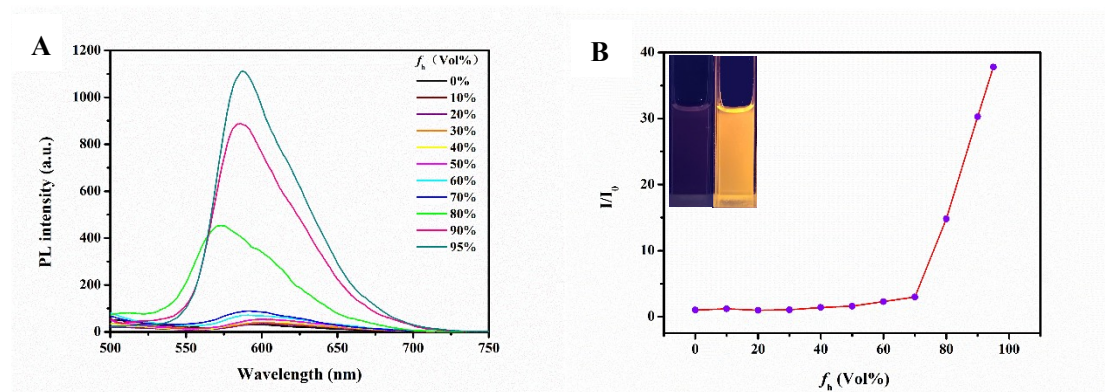

**Figure S10.** (A, B) PL spectra and the plot of the emission maximum of TPE-Pys-M in dichloromethane and *n*-hexane mixture with different *n*-hexane fractions (0-95%). Inset: fluorescent photographs of TPE-Pys-M in pure dichloromethane and in dichloromethane and *n*-hexane mixtures when the addition of *n*-hexane was 95%.

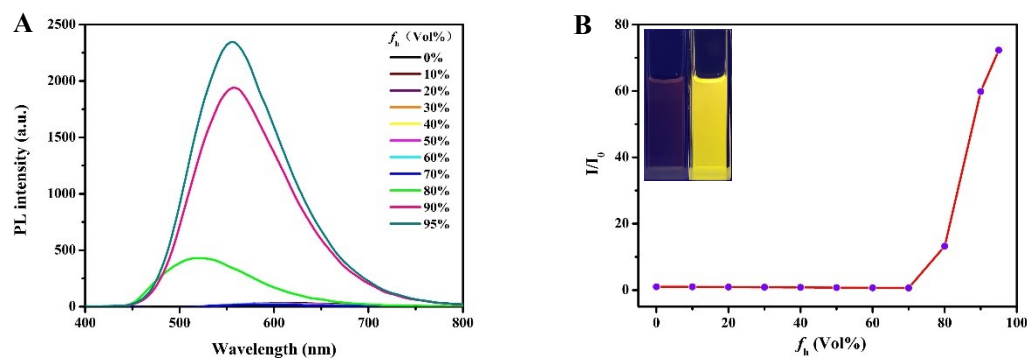

**Figure S11.** (A, B) PL spectra and the plot of the emission maximum of TPE-Pys-B in dichloromethane and *n*-hexane mixture with different *n*-hexane fractions (0-95%). Inset: fluorescent photographs of TPE-Pys-B in pure dichloromethane and in dichloromethane and *n*-hexane mixtures when the addition of *n*-hexane was 95%.

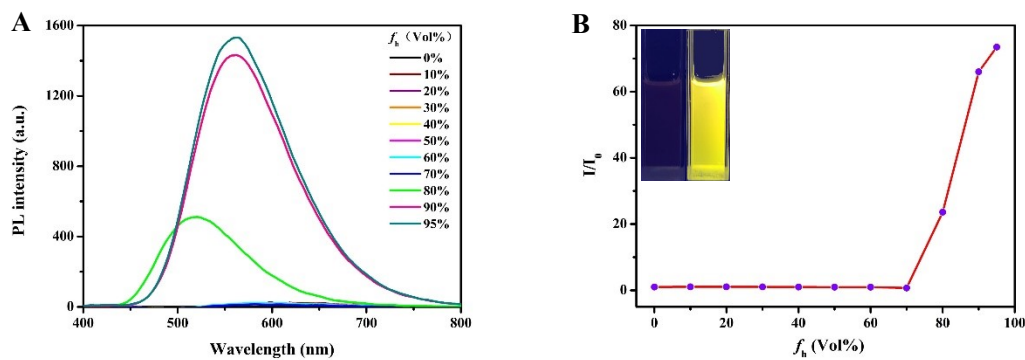

**Figure S12.** (A, B) PL spectra and the plot of the emission maximum of TPE-Pys-BP in dichloromethane and *n*-hexane mixture with different *n*-hexane fractions (0-95%). Inset: fluorescent photographs of TPE-Pys-BP in pure dichloromethane and in dichloromethane and *n*-hexane mixtures when the addition of *n*-hexane was 95%.

### 5. Photostability and solvation effect of compounds

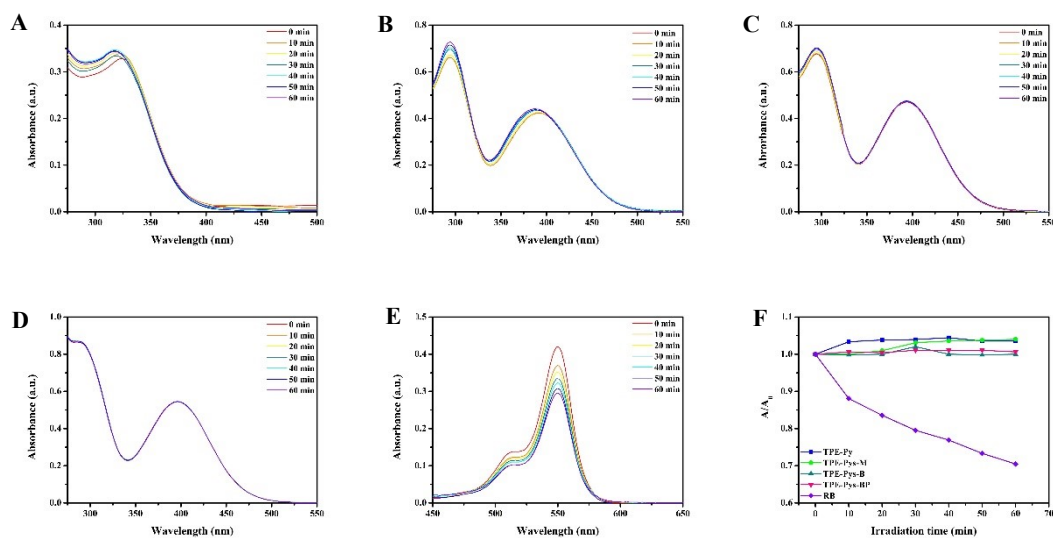

**Figure S13.** Photostability test of TPE-Py, TPE-Pys-M, TPE-Pys-B, TPE-Pys-BP and RB upon white light.

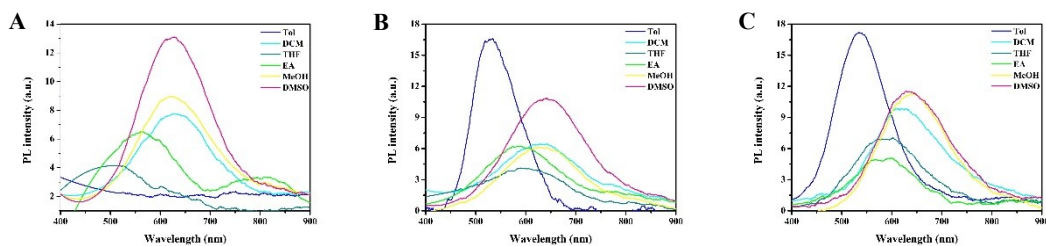

**Figure S14.** PL spectra of TPE-Pys-M, TPE-Pys-B and TPE-Pys-BP in different solvents.

### 6. Study on ROS generation of compounds

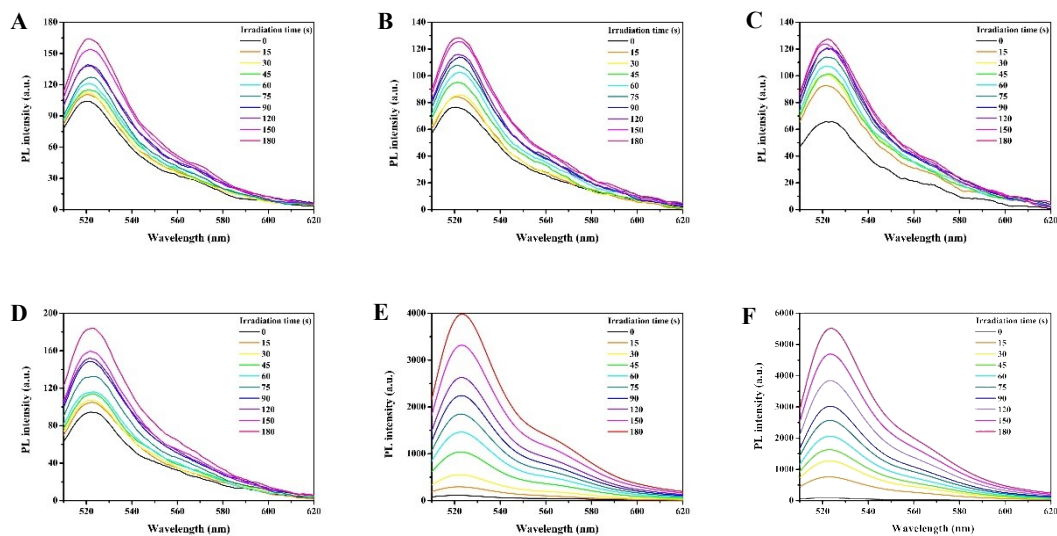

**Figure S15.** ROS generation of blank, TPE-Py, TPE-Pys-M, TPE-Pys-B, TPE-Pys-BP and RB (1  $\mu\text{M}$ ) upon exposure to white light using DCFH (10  $\mu\text{M}$ ) as an indicator.

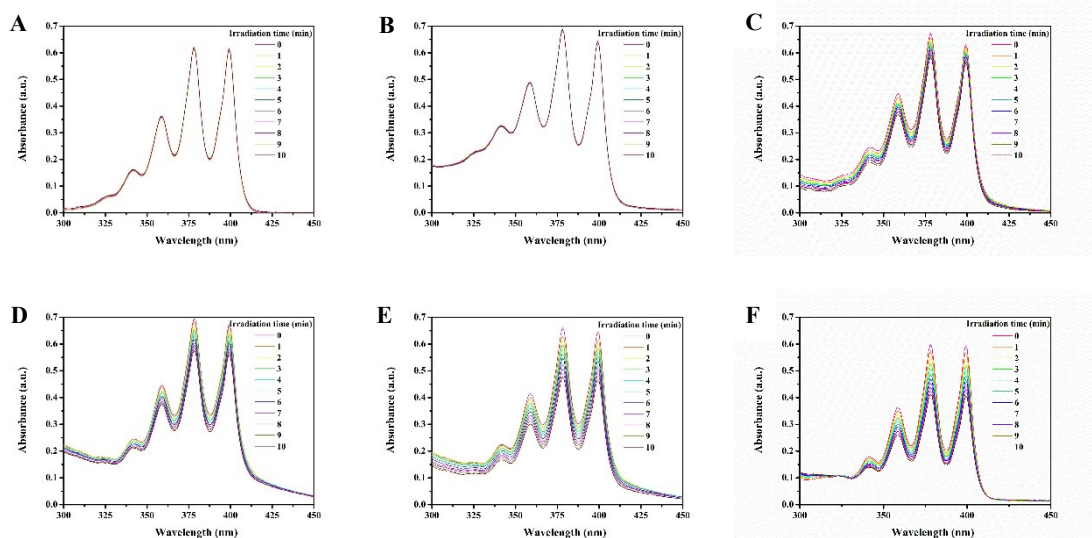

**Figure S16.** Absorption of ABDA (50  $\mu\text{M}$ ,  $^1\text{O}_2$  probe) in water in the presence of blank, TPE-Py, TPE-Pys-M, TPE-Pys-B, TPE-Pys-BP and RB (10  $\mu\text{M}$ ) under white light irradiation for different time.

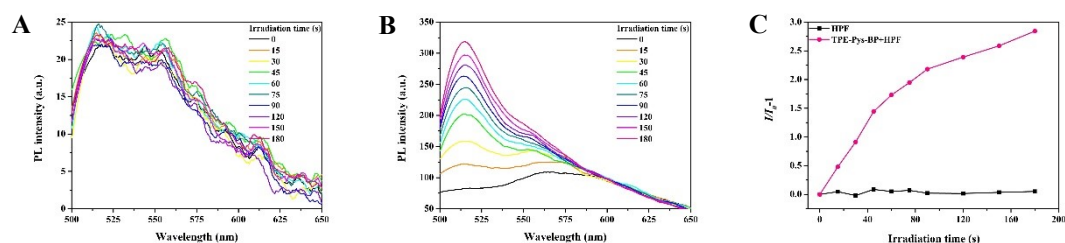

**Figure S17.** The PL spectra of HPF (5  $\mu\text{M}$ ,  $\text{OH}\cdot$  probe) in the presence of 1  $\mu\text{M}$  TPE-Pys-BP in PBS upon white light irradiation with 150  $\text{mW cm}^{-2}$  for different times.

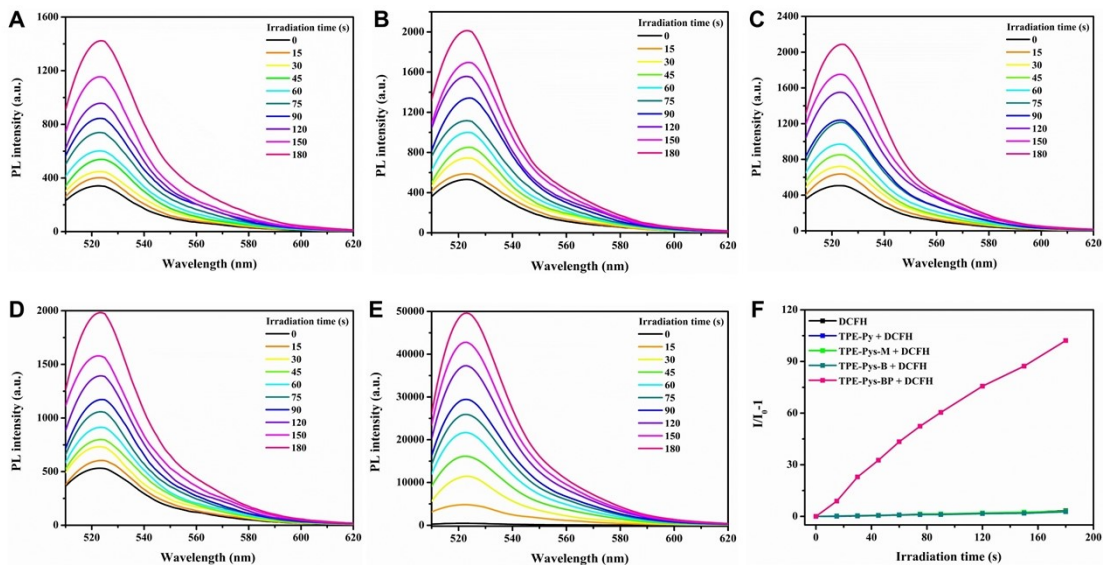

**Figure S18.** ROS generation of blank, TPE-Py, TPE-Pys-M, TPE-Pys-B, and TPE-Pys-BP (1  $\mu\text{M}$ ) upon exposure to white light (25  $\text{mW}/\text{cm}^2$ ) using DCFH (10  $\mu\text{M}$ ) as an indicator.

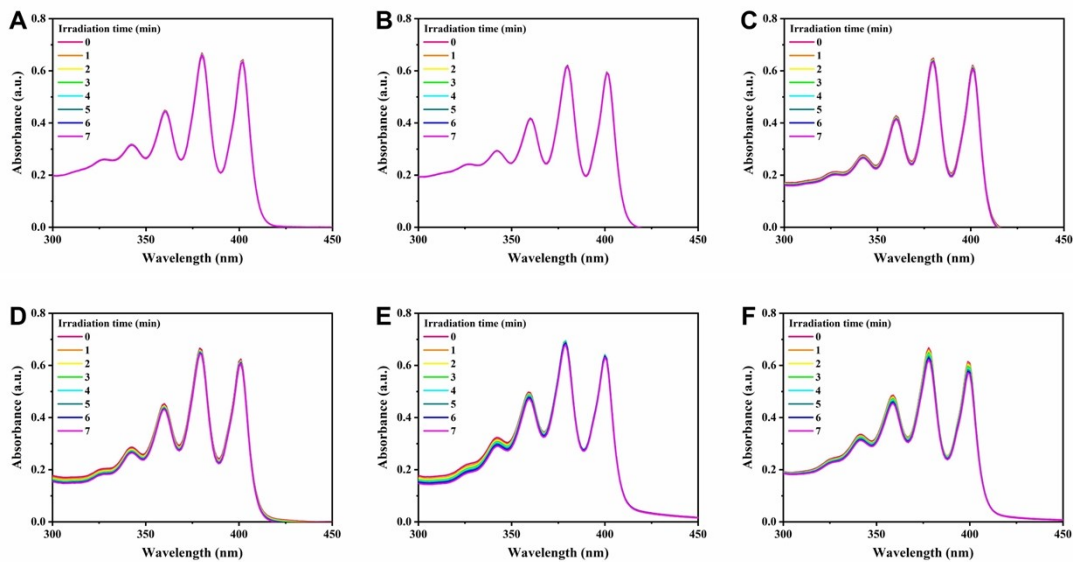

**Figure S19.** The absorbance spectra of ABDA (50  $\mu\text{M}$ ,  $^1\text{O}_2$  probe) at 380 nm in the presence of TPE-Py (10  $\mu\text{M}$ ) in mixtures of DMSO and  $\text{H}_2\text{O}$  with different  $\text{H}_2\text{O}$  fractions (0%, 20%, 40%, 60%, 80% and 95%) upon white-light irradiation (25  $\text{W}/\text{cm}^2$ ).

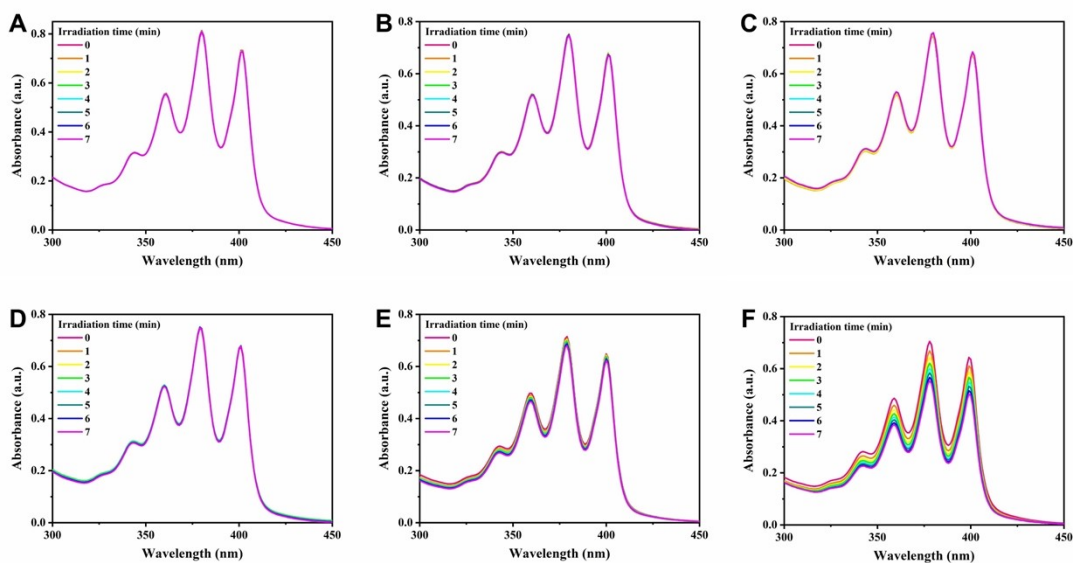

**Figure S20.** The absorbance spectra of ABDA (50  $\mu\text{M}$ ,  $^1\text{O}_2$  probe) at 380 nm in the presence of TPE-Pys-M (10  $\mu\text{M}$ ) in mixtures of DMSO and  $\text{H}_2\text{O}$  with different  $\text{H}_2\text{O}$  fractions (0%, 20%, 40%, 60%, 80% and 95%) upon white-light irradiation (25  $\text{W}/\text{cm}^2$ ).

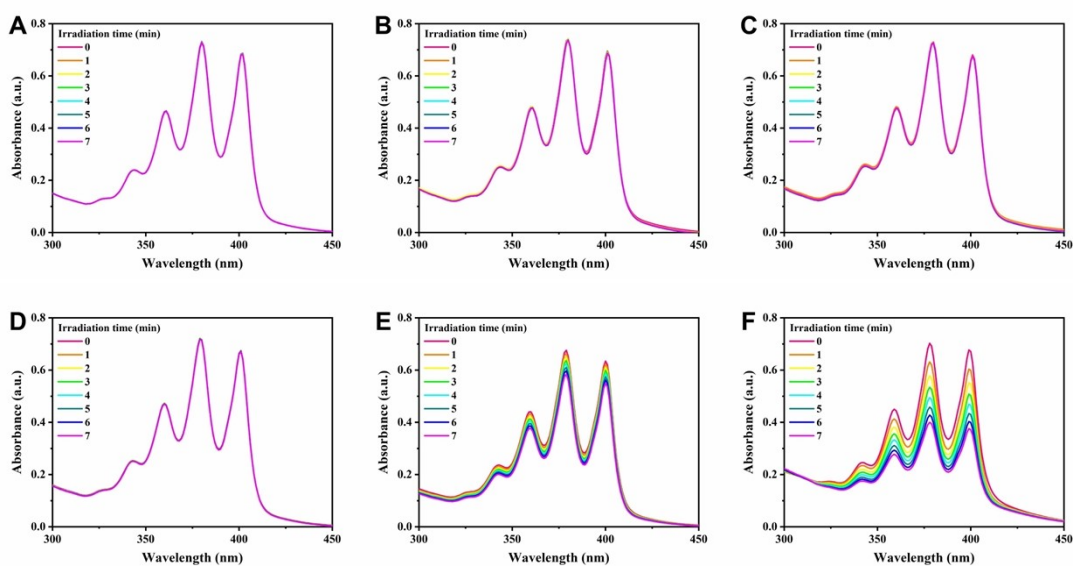

**Figure S21.** The absorbance spectra of ABDA (50  $\mu\text{M}$ ,  $^1\text{O}_2$  probe) at 380 nm in the presence of TPE-Pys-B (10  $\mu\text{M}$ ) in mixtures of DMSO and  $\text{H}_2\text{O}$  with different  $\text{H}_2\text{O}$  fractions (0%, 20%, 40%, 60%, 80% and 95%) upon white-light irradiation (25  $\text{W}/\text{cm}^2$ ).

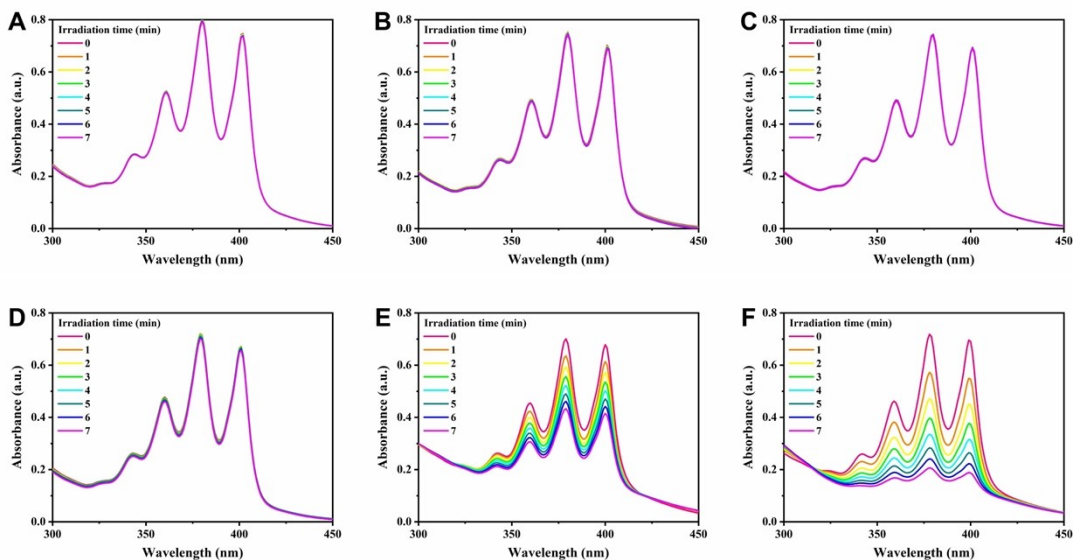

**Figure S22.** The absorbance spectra of ABDA ( $50 \mu\text{M}$ ,  $^1\text{O}_2$  probe) at 380 nm in the presence of TPE-Pys-BP ( $10 \mu\text{M}$ ) in mixtures of DMSO and  $\text{H}_2\text{O}$  with different  $\text{H}_2\text{O}$  fractions (0%, 20%, 40%, 60%, 80% and 95%) upon white-light irradiation ( $25 \text{ W/cm}^2$ ).

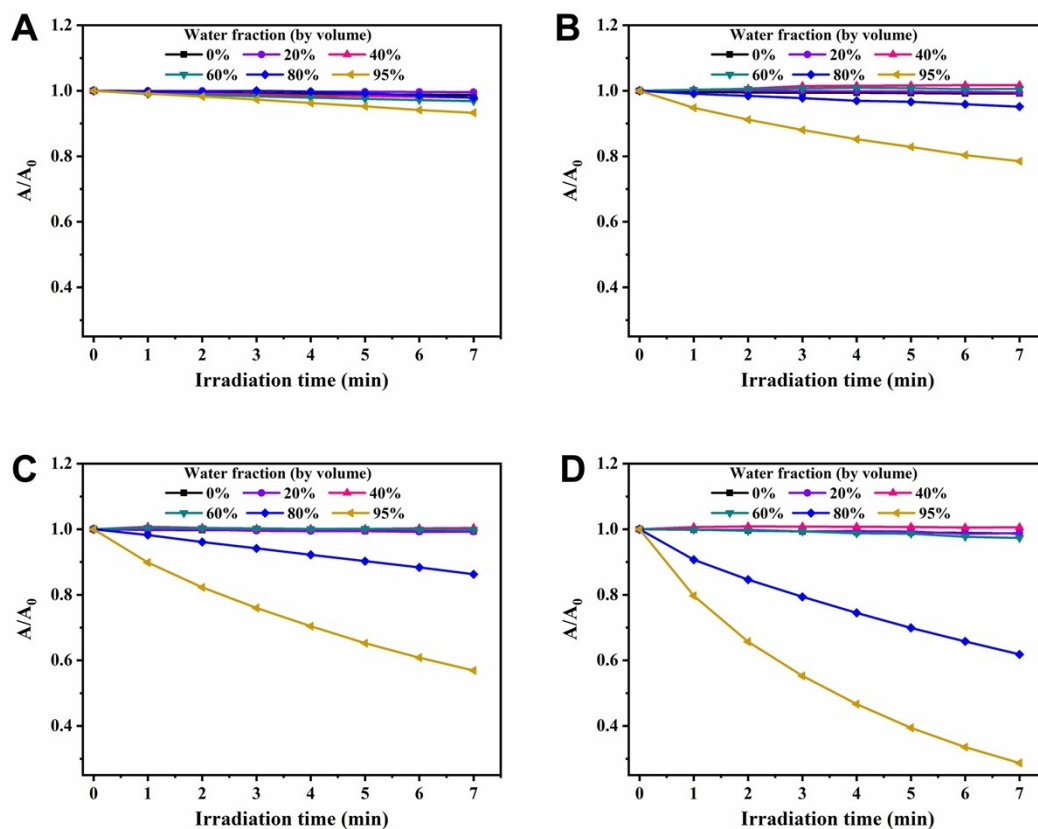

**Figure S23.** Photodegradation of ABDA indicative of  $^1\text{O}_2$  generation induced by (A) TPE-Py, (B) TPE-Pys-M, (C) TPE-Pys-B and (D) TPE-Pys-BP respectively in DMSO/ $\text{H}_2\text{O}$  mixtures with different  $\text{H}_2\text{O}$  fractions (0%, 20%, 40%, 60%, 80% and 95%) under white light irradiation ( $25 \text{ mW/cm}^2$ ).

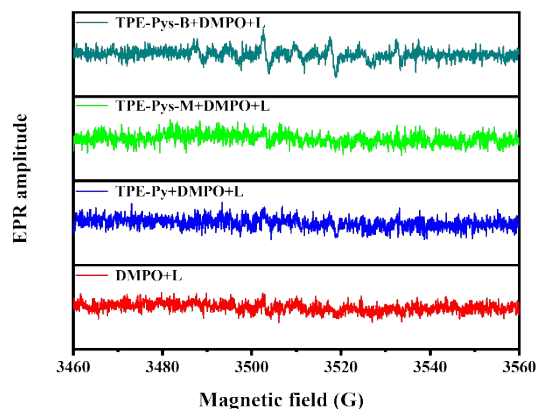

**Figure S24.** EPR signals of DMPO (25 mM) in the presence TPE-Py, TPE-Pys-M and TPE-Pys-B in H<sub>2</sub>O, with/without white light irradiation (150 mW cm<sup>-2</sup>) for 5 min.

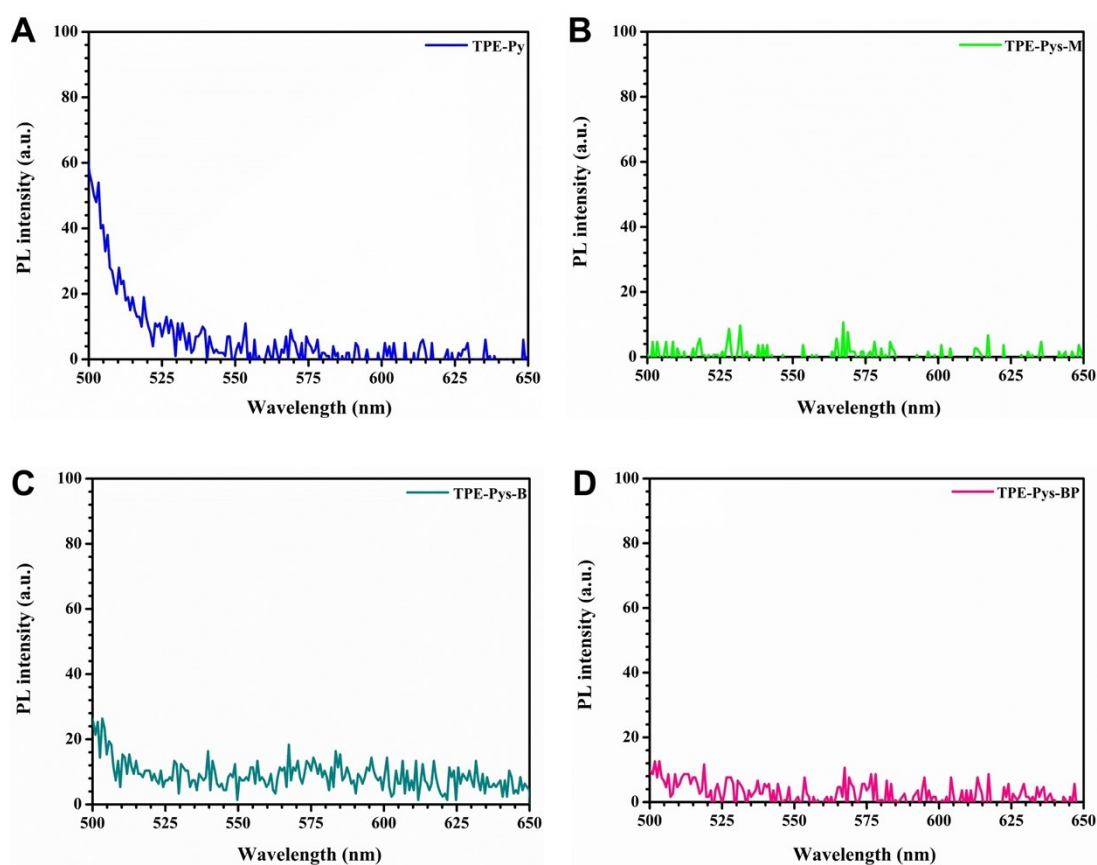

**Figure. S25** PL spectra of TPE-Py, TPE-Pys-M, TPE-Pys-B and TPE-Pys-BP (conc.: 1 μM) in PBS solution ( $\lambda_{\text{ex}} = 488 \text{ nm}$ ).

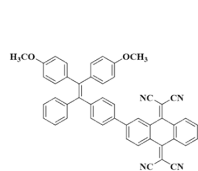

ROS yield: About 1.05-folds of RB  
*Adv. Mater.* **2017**, *29*, 1700548

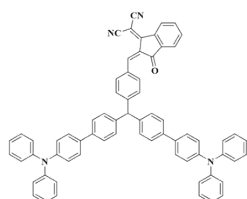

ROS yield: About 2.6-folds of RB  
*Biomaterials* **2021**, *275*, 120934

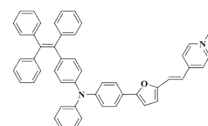

ROS yield: About 2.2-folds of RB  
*Angew. Chem. Int. Ed.* **2020**, *8*, 9610

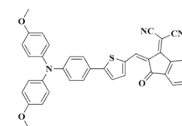

ROS yield: About 1.41-folds of RB  
*ACS Nano* **2021**, *15*, 7328

**Chart 1.** The ROS yield of some reported AIE photosensitizers.

## 7. Cell imaging and cell viability test of compounds

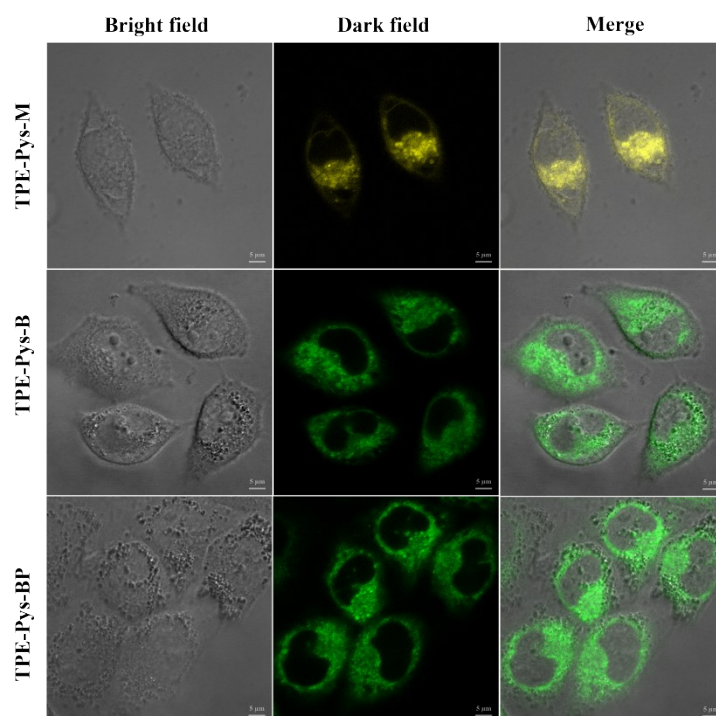

**Figure S26.** Fluorescence images of HeLa cells stained with 10 μM TPE-Pys-M, TPE-Pys-B and TPE-Pys-BP for 4 h respectively.

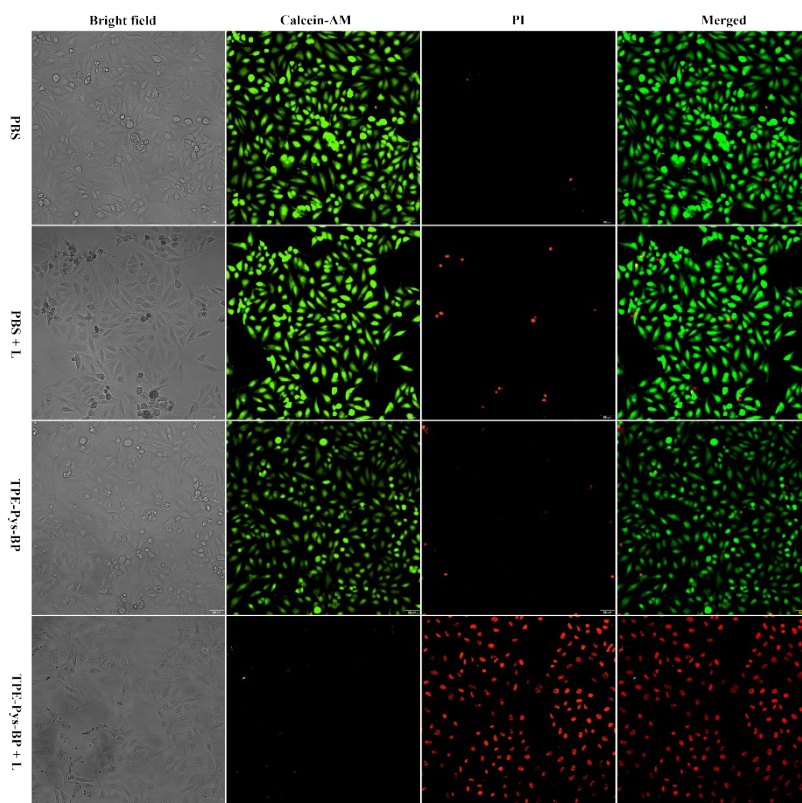

**Figure S27.** live/dead staining assay of HeLa cells after various treatments.

## 8. Mechanoluminescent properties of compounds



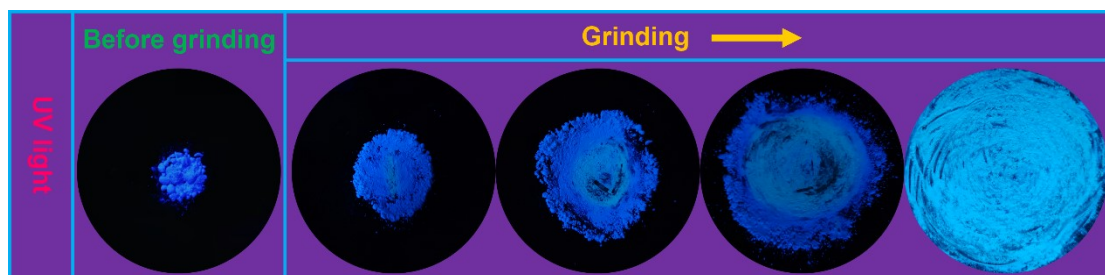

**Figure S28.** The photos of TPE-Py in agate mortar during grinding under illumination at 365 nm.

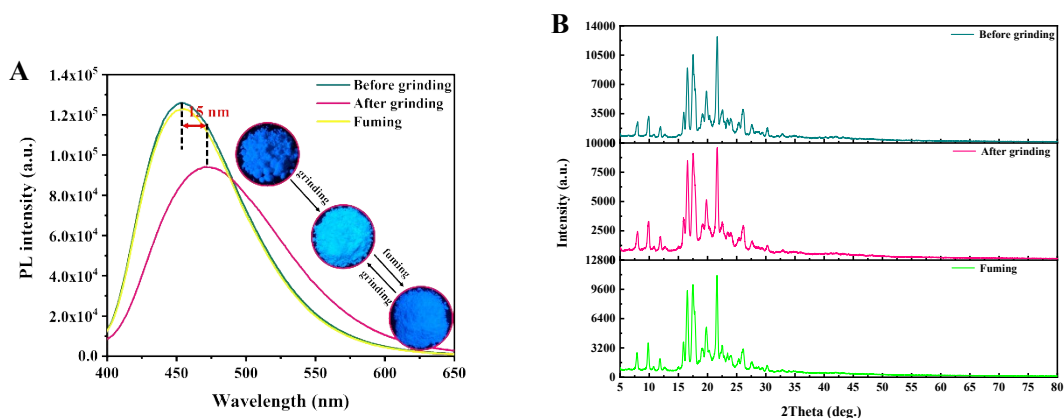

**Figure S29.** (A) Change in the emission spectrum of TPE-Py powder by the grinding, fuming and crystallizing process, inset: fluorescence images of TPE-Py with different treating methods. (B) X-ray diffraction (XRD) spectra of TPE-Py in different aggregated states.

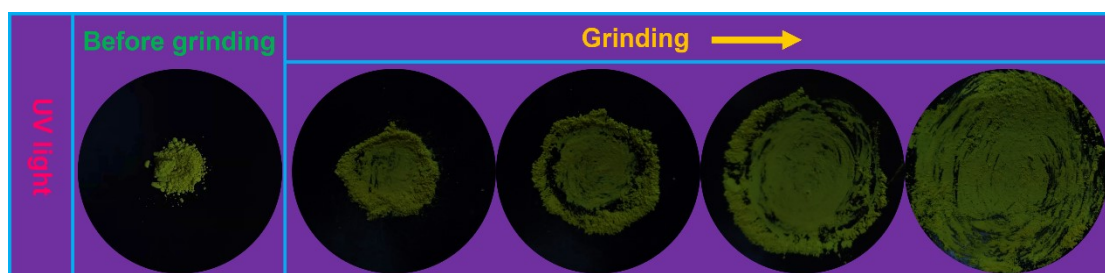

**Figure S30.** The photos of TPE-Pys-M in agate mortar during grinding under illumination at 365 nm.

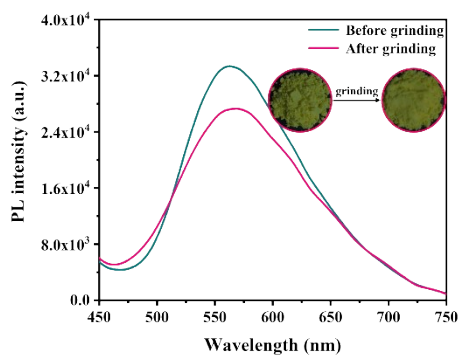

**Figure S31.** Changes of emission spectra of TPE-Pys-M before and after grinding.

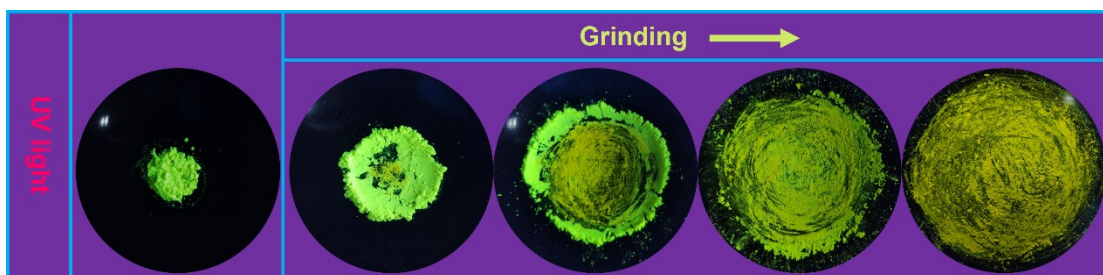

**Figure S32.** The photos of TPE-Pys-B in agate mortar during grinding under illumination at 365 nm.

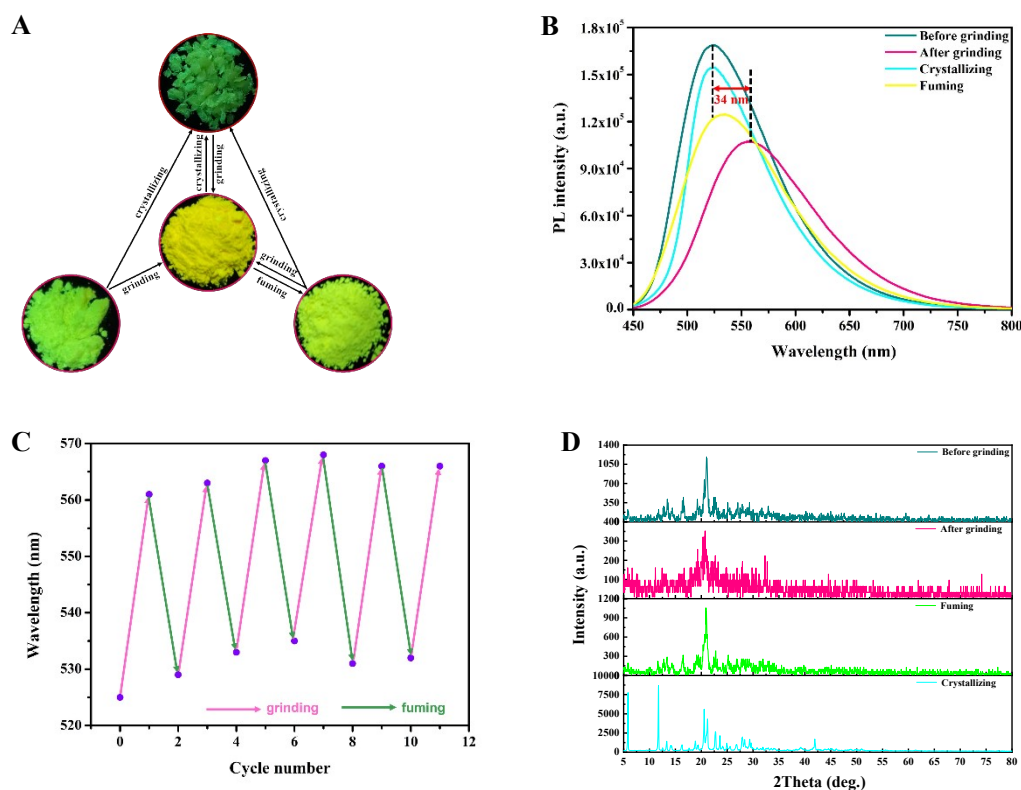

**Figure S33.** (A) Reversible mechanochromic fluorescence images of TPE-Pys-B with different treating methods. (B) Change in the emission spectrum of TPE-Pys-B powder by the grinding, fuming and crystallizing process. (C) X-ray diffraction (XRD) spectra of TPE-Pys-B in different aggregated states. (D) Repeated switching of the solid-state fluorescence of TPE-Pys-B by repeated grinding and fuming cycles.

### 9. Single crystal date of TPE-Pys-B

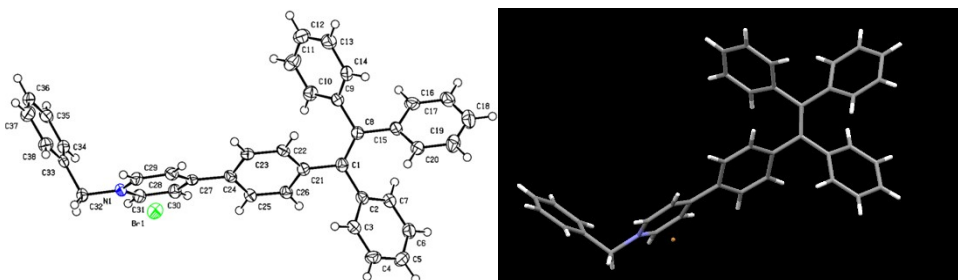

**Figure S34.** Single crystal structure of TPE-Pys-B.

**Table S3.** Crystal data and structure refinement for TPE-Pys-B.

---

|                                             |                                                                |
|---------------------------------------------|----------------------------------------------------------------|
| Identification code                         | TPE-Pys-B                                                      |
| Empirical formula                           | C <sub>38</sub> H <sub>30</sub> BrN                            |
| Formula weight                              | 580.54                                                         |
| Temperature/K                               | 150.00(10)                                                     |
| Crystal system                              | monoclinic                                                     |
| Space group                                 | P2 <sub>1</sub>                                                |
| a/Å                                         | 9.1911(2)                                                      |
| b/Å                                         | 10.7975(2)                                                     |
| c/Å                                         | 15.0783(3)                                                     |
| $\alpha$ /°                                 | 90                                                             |
| $\beta$ /°                                  | 97.991(2)                                                      |
| $\gamma$ /°                                 | 90                                                             |
| Volume/Å <sup>3</sup>                       | 1481.85(5)                                                     |
| Z                                           | 2                                                              |
| $\rho_{\text{calc}}$ /cm <sup>3</sup>       | 1.301                                                          |
| $\mu$ /mm <sup>-1</sup>                     | 2.080                                                          |
| F(000)                                      | 600.0                                                          |
| Crystal size/mm <sup>3</sup>                | 0.14 × 0.12 × 0.11                                             |
| Radiation                                   | Cu K $\alpha$ ( $\lambda$ = 1.54184)                           |
| 2 $\Theta$ range for data collection/°      | 5.918 to 133.12                                                |
| Index ranges                                | -10 ≤ h ≤ 10, -12 ≤ k ≤ 11, -17 ≤ l ≤ 17                       |
| Reflections collected                       | 8600                                                           |
| Independent reflections                     | 4060 [ $R_{\text{int}}$ = 0.0199, $R_{\text{sigma}}$ = 0.0241] |
| Data/restraints/parameters                  | 4060/1/361                                                     |
| Goodness-of-fit on F <sup>2</sup>           | 1.026                                                          |
| Final R indexes [ $I \geq 2\sigma(I)$ ]     | $R_1 = 0.0343$ , $wR_2 = 0.0937$                               |
| Final R indexes [all data]                  | $R_1 = 0.0345$ , $wR_2 = 0.0939$                               |
| Largest diff. peak/hole / e Å <sup>-3</sup> | 0.60/-0.39                                                     |
| Flack parameter                             | 0.018(19)                                                      |

---
